# Supplementary material for: On the mechanism of automated fizzy extraction
Source: PeerJ journal article supplement (doi:10.7717/peerj-achem.2), 2019-12-20
Supplement: Table_S1.docx [file Table_S1.docx]

**Table S1.** MRM transitions for the test analytes included in this study.

| **Compound** | **Precursor ion *m/z*** | **Fragment ion *m/z*** | **Collision voltage / V** |
| --- | --- | --- | --- |
| Ethyl propionate | 103 | 75 | -10 |
| Ethyl butyrate | 117 | 89 | -10 |
| Ethyl pentanoate | 131 | 103 | -10 |
| Ethyl hexanoate | 145 | 117 | -10 |
| Ethyl heptanoate | 159 | 131 | -10 |
| Ethyl octanoate | 173 | 145 | -10 |
| Ethyl nonanoate | 187 | 159 | -10 |
| Ethyl decanoate | 201 | 173 | -10 |
| Ethyl undecanoate | 215 | 57 | -30 |
| Limonene | 137 | 81 | -20 |
