# Supplementary material for: On the mechanism of automated fizzy extraction
Source: PeerJ journal article supplement (doi:10.7717/peerj-achem.2), 2019-12-20
Supplement: Table_S2.docx [file Table_S2.docx]

**Table S2.** Physical properties of the analytes included in this study (approximate values from various on-line sources and datasheets provided by the chemical supplier; temperature: 293-298 K; pressure: 101.3 kPa).

| **Compound** | **Formula** | **Molecular**  **weight**  **/ amu** | **Boiling**  **point**  **/ K** | **Vapor**  **pressure**  **/ kPa** | **Decimal**  **logarithm**  **of octanol/**  **water**  **partition**  **coefficient** | **Solubility**  **in water**  **/ g kg-1** | **Surface**  **tension**  **/ N m-1** |
| --- | --- | --- | --- | --- | --- | --- | --- |
| Ethyl propionate | C5H10O2 | 102.13 | 369 | 5.92 | 0.98 | 42.40 | 0.0249 |
| Ethyl butyrate | C6H12O2 | 116.16 | 395 | 1.85 | 1.42 | 11.80 | 0.0259 |
| Ethyl pentanoate | C7H14O2 | 130.18 | 419 | 0.63 | 1.87 | 3.71 | 0.0267 |
| Ethyl hexanoate | C8H16O2 | 144.21 | 441 | 0.23 | 2.31 | 1.16 | 0.0273 |
| Ethyl heptanoate | C9H18O2 | 158.24 | 461 | 0.08 | 2.76 | 0.31 | 0.0279 |
| Ethyl octanoate | C10H20O2 | 172.27 | 480 | 0.03 | 3.20 | 0.08 | 0.0283 |
| Ethyl nonanoate | C11H22O2 | 186.30 | 493 | 0.01 | 3.65 | 0.03 | 0.0287 |
| Ethyl decanoate | C12H24O2 | 200.32 | 516 | ~ 0 | 4.09 | 0.01 | 0.0291 |
| Ethyl undecanoate | C13H26O2 | 214.35 | 531 | ~ 0 | 4.54 | 0.00 | 0.0294 |
| Limonene | C10H16 | 136.24 | 448 | 0.20 | 3.22 | 0.46 | 0.0260 |
